# Supplementary material for: Long-range isentropic transport of stratospheric aerosols over Southern Hemisphere following the Calbuco eruption in April 2015
Source: Copernicus journal article supplement (doi:10.5194/acp-2017-544), 2017-06-22
Supplement: Supplementary file [file acp-2017-544-RC2-supplement.pdf]

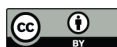

1 **Long-range isentropic transport of stratospheric aerosols over**  
2 **Southern Hemisphere following the Calbuco eruption in April**  
3 **2015**

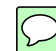

4 **Nelson. Bègue<sup>1</sup>, Damien. Vignelles<sup>2</sup>, Gwenaël. Berthet<sup>2</sup>, Thierry. Portafaix<sup>1</sup>, Guillaume.**  
5 **Payen<sup>1</sup>, Fabrice. Jégou<sup>2</sup>, Hassan. Benchérif<sup>2,6</sup>, Julien. Jumelet<sup>3</sup>, Jean-Paul Vernier<sup>4</sup>,**  
6 **Thibaut. Lurton<sup>2</sup>, Jean-Baptiste. Renard<sup>2</sup>, Lieven. Clarisse<sup>5</sup>, Vincent. Duverger<sup>2</sup>,**  
7 **Françoise. Posny<sup>1</sup> Jean-Marc. Metzger<sup>1</sup> and Sophie. Godin-Beekmann<sup>3</sup>**

8 [1] Laboratoire de l'Atmosphère et des Cyclones, UMR 8105 CNRS, Université de la  
9 Réunion, Reunion Island, France.

10 [2] Laboratoire de Physique et Chimie de l'Environnement et de l'Espace, Université  
11 d'Orléans, CNRS/INSU UMR7328, Orléans, France

12 [3] Laboratoire Atmosphère Milieux Observations Spatiales, University of Paris VI, Paris,  
13 France

14 [4] NASA Langley Research Center, Hampton, Virginia, USA

15 [5] Spectroscopie de l'Atmosphère, Service de Chimie Quantique et Photophysique,  
16 Université Libre de Bruxelles, Brussels, Belgium

17 [6] School of Chemistry and Physics, University of KwaZulu-Natal, Westville, Durban, South  
18 Africa

19 Correspondence to: N.Bègue ([nelson.begue@univ-reunion.fr](mailto:nelson.begue@univ-reunion.fr))

20 **Abstract**

21 After 43 years of inactivity, the Calbuco volcano which is located in the southern part of Chile  
22 erupted on 22 April 2015. The space-time evolutions (distribution and transport) of its aerosol  
23 plume are investigated by combining satellite (CALIOP, IASI, OMPS), in situ aerosol  
24 counting (LOAC OPC) and lidar observations, and the MIMOSA advection model. The  
25 Calbuco aerosol plume reached the Indian Ocean 1 week after the eruption. Over the Reunion  
26 Island site (21°S; 55.5°E), the aerosol signal was unambiguously enhanced in comparison  
27 with “background” conditions with a volcanic aerosol layer extending from 18 km to 21 km  
28 during the May-July period. All the data reveal an increase by a factor of ~2 in the SAOD  
29 (Stratospheric Aerosol Optical Depth) with respect to values observed before the eruption.



1 The aerosol e-folding time is approximately 90 days. Microphysical measurements obtained  
2 before, during and after the eruption reflecting the impact of the Calbuco eruption on the  
3 lower stratospheric aerosol content have been analyzed over Reunion site. During the passage  
4 of the plume, the volcanic aerosol was characterized by an effective radius of  $0.16 \pm 0.02 \mu\text{m}$   
5 with an unimodal lognormal size distribution and the aerosol number concentration appears  
6 20 times higher than before and one year after the eruption. A tendency toward “background”  
7 conditions has been observed about one year after the eruption, by April 2016. The volcanic  
8 aerosol plume is advected eastward in the Southern Hemisphere and its latitudinal extent is  
9 clearly bounded by the subtropical barrier and the polar vortex. The transient behavior of the  
10 aerosol layers observed above Reunion Island between May and July 2015 reflects an  
11 inhomogeneous geographical distribution of the plume which is controlled by the latitudinal  
12 motion of these dynamical barriers.

## 13 1. Introduction

14 Stratospheric aerosol affect the chemical and radiation balance of the atmosphere  
15 (McCormick et al., 1995; Solomon, 1999; SPARC 2006). The importance of stratospheric  
16 aerosol on the chemistry is mainly due to their role on ozone budget (Solomon et al., 1986;  
17 Bekki, 1997; Borrmann et al., 1997). Indeed, stratospheric aerosol provide sites for  
18 heterogeneous chemical reactions leading to stratospheric ozone depletion, significantly  
19 enhanced in periods of high aerosol loadings following major volcanic eruptions (Solomon,  
20 1999 and references therein). In addition, periods of enhanced stratospheric aerosol loadings  
21 can lead to significant warming in the stratosphere and cooling in the troposphere (e.g.  
22 McCormick et al., 1995; Solomon et al., 2011; Arfeuille et al., 2013). As reported by Kremser  
23 et al. (2016), a better understanding of the processes governing the lifetime of stratospheric  
24 aerosol is needed to assess the impacts on climate and chemistry. Since the discovery of the  
25 permanent stratospheric aerosol layer, called Junge Layer, in 1961 (Junge, 1961), it has been  
26 established that stratospheric aerosol are mostly composed of sulfuric acid droplets with some  
27 more complex characteristics in the lower stratosphere and upper stratosphere where organic  
28 compounds and meteoritic dust can also contribute to its composition (Neely et al., 2011,  
29 Froyd et al., 2009). The main sources of stratospheric sulfur are Carbonyl Sulfide (OCS),  
30 Dimethyl Sulfide (DMS) and sulfur dioxide ( $\text{SO}_2$ ) (SPARC, 2006), the latest being  
31 significantly enhanced after volcanic eruptions (Carn et al., 2015). The injected  $\text{SO}_2$  is then  
32 oxidized into  $\text{H}_2\text{SO}_4$ , which after homogeneous nucleation and/or condensation onto existing  
33 aerosol, results in an increase in the content of liquid sulfate aerosol (SPARC, 2006).



1 Thomason et al. (2007) have shown that volcanic effects have dominated other natural and  
2 anthropogenic sources on the control of the stratospheric aerosol burden over the last 25   
3 years. Previous studies on stratospheric aerosol have mainly contributed to characterize their  
4 properties and variability during “background” (i.e. free of volcanic aerosol) and volcanic  
5 conditions (e.g., Stenchikov et al., 1998; Jäger and Deshler, 2002; Bauman et al., 2003;  
6 Hermann et al.; 2003; Hofmann et al.; 2009).

7 The eruption of the Pinatubo in 1991 is known to be the last major volcanic eruption which  
8 injected up to 20 Tg of SO<sub>2</sub> and perturbed significantly the global stratosphere for several  
9 years (Kinninson et al., 1994; McCormick et al., 1995; Stenchikov et al., 1998, 2002; Dhomse  
10 et al., 2014). As reported by Russell et al. (1996), in addition to the prodigious increase in the  
11 stratospheric aerosol loading, this event has significantly affected numerous aspects of the  
12 atmospheric system including: i) a 2-year cooling of the global surface temperature of several  
13 tenths of degrees (Canty et al., 2013; Wunderlich and Mitchell, 2017) ii) a warming of the  
14 tropical stratosphere (~3,5 K) near the aerosol peak (Labitze and McCormick et al., 1992) or  
15 also a lifting of the tropical ozone layer by ~1.8 km (Pueschel et al., 1992; Grant et al., 1994).

16 By the use of satellite and balloon-borne observations, studies have shown that moderate  
17 volcanic eruptions (i.e., 10-20 times weaker than Pinatubo eruption in term of injected sulfur)  
18 could significantly modulate stratospheric aerosol concentrations (Bourassa et al., 2010;  
19 Kravitz et al., 2010; Solomon et al., 2011; Vernier et al., 2011; Clarisse et al., 2012; Jégou et  
20 al., 2013). Based upon satellite observations, Vernier et al (2011) showed that the decadal  
21 increase in stratospheric aerosol loadings since 2002 can be attributed to a series of moderate  
22 volcanic eruption. As reported by Kremser et al (2016), this decadal trend was also obtained  
23 from lidar (Hofmann et al., 2009) and ground-based sun-photometer observations (Ridley et  
24 al., 2014). Three moderate volcanic eruptions are ranked in the top 10 of the most influential  
25 events on the stratospheric aerosol burden including: (1) The Kasatochi eruption (52° N;  
26 175°W, Alaska) in 2008 which injected 1.5-2.5 Tg of SO<sub>2</sub> into the upper troposphere and  
27 lower stratosphere (UTLS) (Bourassa et al., 2010; Kravitz et al., 2010; Krotkov et al., 2010);  
28 (2) The Sarychev eruption in June 2009 (48.1°N; 153.2°E, Kuril Island) which released 0.9 Tg  
29 of SO<sub>2</sub> into the UTLS (Clarisse et al., 2012; Kravitz et al., 2011; Jégou et al., 2013); (3) The  
30 Nabro eruption (13°N; 41°E, Eritrea) in June 2011 which emitted 1.3 Tg of SO<sub>2</sub> (Bourassa et  
31 al., 2012; Sawamura et al; 2012). In comparison, these recurrent “minor” volcanic eruptions  
32 injected 10-20 times less SO<sub>2</sub> than Mt Pinatubo, but contributed to counterbalance the global  
33 warming observed between 2000 and 2010 (Solomon et al., 2011). These eruptions can also



1 be used to understand stratospheric **dynamic** as it was done **after Mt Pinatubo** (Trepte et al.,  
2 1992).

3 Indeed, **following** a volcanic eruption, stratospheric aerosol can be used **as dynamical tracers**  
4 (Bencherif et al., 2003; Fairlie et al., 2014). Based on satellite observations and a **lagrangian**  
5 trajectory model, Fairlie et al. (2014) used the dispersion of the Nabro plume to study the  
6 dynamics of the Asian Monsoon Anticyclone. Hitchman et al. (1994) and SPARC (2006)  
7 suggested that the stratospheric aerosol distributions could be used to understand changes in  
8 the Brewer-Dobson **Circulation**. Previous works have also revealed that stratospheric aerosol  
9 can be used to study **meridional transport** from the tropical stratospheric reservoir (Trepte and  
10 Hitchman, 1992; Randel et al., 1993; Chen et al., 1994; Grant et al., 1996, Vernier et al.,  
11 2009). Based on satellite observations, Trepte and Hitchman (1992) **have shown** that **transport**  
12 to mid-latitudes **is mainly favored** during **westerly** shear phases of **the QBO** than during the  
13 easterly shear phases. More recently, by the use of satellite observations and climate models,  
14 Hommel et al. (2015) revealed that the vertical and latitudinal extent of the stratospheric  
15 aerosol layer (between 16 and 31 km) in the tropics is modulated by **QBO**.

16 This paper reports on the Calbuco plume observations over **Reunion Island** and its transport in  
17 the southern tropics. The geometrical and optical properties of the Calbuco plume are inferred  
18 from the ground-based observations at Reunion Island in the framework of the MORGANE  
19 (Maïdo ObservatoRy Gas Aerosols NDACC Experiment) campaign. **The aim of this study is**  
20 **to provide the dynamical framework controlling the time-space evolution of the volcanic**  
21 **plume in the southern hemisphere**. The paper is organized as follows: Section 2 describes the  
22 **observations** and the model used for the investigation of the volcanic aerosol transport. A  
23 description of the long-range transport of the volcanic plume over the Indian Ocean is  
24 provided in Section 3; Section 4 gives a dynamical analysis of this case study; and the  
25 summary and **the** conclusions are given in Section 5.

## 26 **2. Instrumentation and model description**

### 27 **2.1 Observations**

#### 28 **2.1.1 Ground-based lidar**

29 One part of the observations **used** in this study was performed during the MORGANE  
30 campaign which took place at the Maïdo observatory on Reunion Island (**21°S; 55°E**) in May  
31 2015. The MORGANE ground-based observational systems combine **Lidar** and balloon-borne  
32 payloads to study the composition and **the** dynamics of the **Upper Troposphere-Lower**

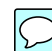



1 Stratosphere (UTLS) in the southern hemisphere. Among the 4 lidar systems operated during  
2 this campaign, we used the measurements from the stratospheric Differential Absorption  
3 Lidar (DIAL) system built for the monitoring of the stratospheric ozone profile (Baray et al.,  
4 2013). It is possible to retrieve also aerosol profiles in the 15-38 km altitude range from these  
5 measurements. This instrument has been in operation at the Maïdo observatory since early  
6 2013. The technical details and evaluation of its performance are given by Baray et al.,  
7 (2013). A brief description of this DIAL system is given hereafter. It uses a tripled Nd:YAG  
8 laser which provides a beam at 355 nm wavelength with a repetition rate of 30 Hz and a XeCl  
9 excimer laser which emits a radiation at 308 nm at 40 Hz. The optical receiver is a telescope  
10 composed of 4 parabolic mirrors where the backscattered signal is collected by 4 optical  
11 fibers located at the focal points. The current configuration of the DIAL lidar system mainly  
12 detects in the UV bands (308, 332, 355 and 387 nm). The lidar data set used in this study  
13 consists of daily records of backscattering signal obtained from the Maïdo facility between 1  
14 November 2014 and 30 November 2016 (106 profiles). It should be noted that no  
15 measurements were recorded at Reunion from January to April 2016 because of technical  
16 problems. The daily measurements are nocturnal and time-integrated over about 3 hours in  
17 average.

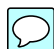

18 The method involves obtaining the extinction and backscatter coefficient from a Rayleigh Mie  
19 lidar has been described first by Klett (1981). The methodology of Sasano (1985), used here,  
20 is similar and has the advantage to give a numerical calculation of the extinction and  
21 backscatter coefficient. Several parameters are needed: first, the temperature and the pressure  
22 come from a radiosounding realized in the airport of Gilot at 11h (UTC). The profile is  
23 completed by the Arletty model, based on European Centre for Medium Range Weather  
24 Forecast (ECMWF) data. The second parameter is the ratio between the backscatter and the  
25 extinction coefficient for aerosol, also call lidar coefficient. It depends of the kind of aerosol.  
26 In the case of background stratospheric aerosol, the value found in the literature is near 60.  
27 The third parameter is the altitude of reference defined as the altitude where there is no  
28 aerosol. The altitude of reference is determined for each profile. On average, the altitude of  
29 reference is located between 30 and 40 km.

### 30 2.1.2 Balloon-borne OPC.

31 In order to analyze the concentration and the size of the observed aerosol over the site, many  
32 LOAC (Light Optical Aerosols Counter) systems were launched together with balloon-  
33 ozonesondes. A detailed description of the LOAC is given by Renard et al. (2016). In brief,



1 LOAC is a lightweight Optical Particle Counter (OPC) of 1 kg which can fly under latex  
2 weather balloons. Through the measurements of the light scattered by particles at two specific  
3 angles (Lurton et al. 2014), it provides aerosol concentrations and particle size distributions  
4 for 19 size classes ranging from 0.2  $\mu\text{m}$  to 50  $\mu\text{m}$  in diameter every ten seconds with a  
5 vertical resolution of nearly 50 m depending on the ascent rate of the balloon. The number  
6 concentration range is from 0.6 to a few thousands particles per  $\text{cm}^3$  (Vignelles 2017).  
7 Uncertainties on number concentration during the ascent under meteorological balloon are  
8 mainly due to temperature variation effects on electronics (Renard et al. 2016, Vignelles  
9 2017). Uncertainties on number concentrations for size bins than 1  $\mu\text{m}$  is estimated to be of  $\pm$   
10 30 %. For larger size bins, uncertainties on number concentration is dominated by Poisson  
11 law statistics estimated to be  $\pm$  20 % and  $\pm$  60 % at concentrations respectively lower than  $10^1$   
12 <sup>1</sup> and  $10^2$  part per  $\text{cm}^3$ .

### 13 2.1.3 CALIOP

14 The Cloud-Aerosols Lidar with Orthogonal Polarization (CALIOP) on board The Cloud-  
15 Aerosols Lidar and Infrared Pathfinder Satellite Observation (CALIPSO) was used to study  
16 the transport of the Calbuco plume. CALIPSO was launched in 2006 to a Sun-synchronous  
17 polar orbit (Winkler et al., 2007) with a repeat cycle of 16 days. CALIPSO is composed of an  
18 Infrared Imager Radiometer (IIR), a wide field visible camera and the CALIOP lidar.  
19 CALIOP is a two-wavelength polarization-sensitive lidar (532 and 1064 nm) which measures  
20 total attenuated backscatter vertical profiles with altitude-varying vertical (30-300 m) and  
21 horizontal (300-5000 m) resolution (Winker et al., 2010). The data used in this study are the  
22 total and perpendicular backscatter coefficient at 532 nm available from the CALIOP level 1B  
23 V4.01 product. These data have been averaged every 1 degree in latitude for each orbit and  
24 grouped into data files containing 16 days of measurements. From there, Scattering Ratio and  
25 Depolarization Ratio coefficients at 532 nm have been calculated (Vernier et al., 2009).  
26 Through the use of this algorithm, the full zonal mean between 20°S and 20°N are obtained by  
27 averaging 7200 cells, leading to a precision of  $\pm$  1.6 % (Vernier et al., 2009). The ability of  
28 CALIOP to detect small volcanic plumes in the lower tropical stratosphere has been  
29 highlighted in previous studies (Thomason et al., 2007; Vernier et al., 2009, 2011).

### 30 2.1.4 IASI

31 The Infrared Atmospheric Sounding Interferometer (IASI) observations were used to quantify  
32 the amount of  $\text{SO}_2$  emitted during the Calbuco eruption. IASI is a nadir looking thermal



1 infrared sounder on board the Meteorological Operational satellite (MetOp-A and MetOp-B)  
2 launched in October 2006 with a polar orbit. Its global spatial coverage and its footprint of 12  
3 km make IASI relevant for monitoring of the key atmospheric species, in particular for the  
4 volcanic SO<sub>2</sub> (Clarisse et al., 2008, 2012; Clerbaux et al., 2009). The amount and altitude of  
5 emitted SO<sub>2</sub> were obtained from the algorithms detailed in Clarisse et al. (2012) and Clarisse  
6 et al. (2014) respectively. For each IASI observation, the height was estimated first, after  
7 which the column was calculated using the height information as an input parameter. In this  
8 study, only data from MetOp-A was used.

### 9 2.1.5 OMPS

10 The Ozone Mapper and Profiler Suite (OMPS) Limb Profiler (LP) is also used in the present  
11 study to analyze the optical properties of the volcanic plume over the Reunion site. OMPS  
12 was launched on October 2011 on board the Suomi National Polar Partnership (NPP)  
13 spacecraft. The data used in this study are the daily extinction profiles at 675 nm. A detailed  
14 description of the aerosol extinction retrieval algorithm is given by Jaross et al. (2012) and  
15 Rault and Loughman (2013). Briefly, the measured spectrum is used to infer information on  
16 the size distributions and the radiances are normalized to their value at 35.5 km (weak  
17 contribution of aerosol extinction). Then, the extinction coefficients are retrieved using the  
18 Rodgers' maximum likelihood technique. We used 2 years (From November 2014 to  
19 November 2016) of satellite overpasses above the lidar site, within a 5°x5° in latitude and  
20 longitude grid. OMPS data have already used to be very effective at detecting and  
21 characterizing major events, such as the Chelyabinsk bolide in February 2013 (Gorkavyi et  
22 al., 2013).

### 23 2.2 MIMOSA model

24 The Modèle Isentropique de transport Mésoéchelle de l'Ozone Stratosphérique par Advection  
25 (MIMOSA) model (Hauchecorne et al., 2002) is a Potential Vorticity (PV) advection model  
26 running on isentropic surfaces. The advection scheme is semi-Lagrangian with a time step of  
27 1 hour. The re-gridding onto the original orthonormal grid is performed every 6 hours. The  
28 model resolution is 0.5°x0.5°. The advection is driven by ECMWF meteorological analyses at  
29 a resolution of 0.5°x0.5°. In the case of the PV, its slow diabatic evolution is taken into  
30 account by relaxing the model PV towards the PV calculated from the ECMWF fields with a  
31 relaxation time of 10 days. Using this procedure, it is possible to run the model continuously  
32 and follow the evolution of PV filaments during several months. The accuracy of the model



1 **has been** evaluated by Hauchecorne et al. (2002) and validated against airborne lidar ozone  
2 measurements using **correlation** between PV and ozone, a quasi-conserved chemical tracer on  
3 a week timescale within most of lower stratosphere (Heese et al., 2001).

#### 4 **2.3 DyBAL code**

5 The Dynamical BARRier Location (DyBAL) code is an original software developed at the  
6 Laboratoire de l'Atmosphère et des Cyclones (LACy, France) to detect the subtropical barrier  
7 position (Portafaix et al., 2003). The dynamical barriers are detected from the equivalent  
8 length of the tracer **contour** and the gradient of isentropic Ertel's potential vorticity (PV) in  
9 equivalent latitude **coordinate** as defined by Nakamura (1996). These two diagnostic tools are  
10 used by **DyBAL** to identify weak mixing and transport barriers. The position of **the** dynamical  
11 barrier is characterized by a local maximum of the PV gradient and a local minimum of the  
12 equivalent length (Nakamura, 1996). The DyBAL code is applied to the PV map obtained  
13 from the MIMOSA model runs. The ability of **DyBAL** to detect the position and **the**  
14 deformation of the dynamical barriers **has been** highlighted in previous studies (Bencherif et  
15 al., 2007; Morel et al., 2005; Portafaix et al., 2003).

### 16 **3. Long-range transport and evolution of the Calbuco volcanic** 17 **plume over the Indian Ocean**

#### 18 **3.1 Formation and transport**

##### 19 **3.1.1 SO<sub>2</sub> plume**

20 After 43 years of inactivity, **the Calbuco erupted** on 22 April 2015 and two intense explosive  
21 events were recorded during the same week. Figure 1 shows the CALIOP cross-section of the  
22 532nm total attenuated backscatter (**ATB**) for the overpass over South America on 24 April.  
23 The **ATB signals ranging** from **1 10<sup>-3</sup> to 5 10<sup>-3</sup> km<sup>-1</sup> sr<sup>-1</sup>** **correspond** to weak values of  
24 brightness temperatures over the southern part of Brazil (34, 22°S; 53, 97°W) **can** be attributed  
25 to volcanic material injected up to the lower stratosphere by the Calbuco eruption.

26 The evolution of the SO<sub>2</sub> total mass measured by **IAI** between 23 April 2015 and 31 May  
27 2015 is reported in Figure 2. The SO<sub>2</sub> total mass is defined as the sum of SO<sub>2</sub> **mass** over the  
28 atmospheric column **from midday to midnight over the southern hemisphere**. **As expected an**  
29 **increase of the SO<sub>2</sub> amounts** was observed by IASI a few days following the Calbuco  
30 eruption. One day after the eruption the SO<sub>2</sub> total mass was 10 times higher **than background**  
31 **levels**. The SO<sub>2</sub> total mass **increased quickly** to its maximum value (0.41 Tg) on 25 April

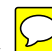





1 2015 and slowly decreased to reach values close to the background values on 19 May 2015  
2 (Figure 2). An e-folding times of ~11 days can be estimated which is in agreement with the  
3 value reported for the Sarychev volcanic eruption (Jégou et al., 2013). The SO<sub>2</sub> total mass  
4 increased again on 28 May 2015 to reach a secondary maximum (0.13 Tg) on 30 May 2015.  
5 This new increase of the SO<sub>2</sub> total mass could be due to the Wolf eruption (Isabela Island,  
6 Galapagos) which occurred on 25 May 2015 (Xu et al., 2016). The amount of SO<sub>2</sub> emitted  
7 during the Calbuco eruption is about two times lower than the SO<sub>2</sub> mass emitted from the  
8 Sarychev eruption in June 2009 (Jégou et al., 2013). It is also worth noting that the SO<sub>2</sub> mass  
9 injected during this event is of the same order as quantified during the Grimsvötn eruption in  
10 May 2011 (Clarisse et al., 2011). Given that the amount of SO<sub>2</sub> emitted in comparison to  
11 previous volcanic eruptions, the Calbuco eruption can be considered as moderate in term of  
12 produced aerosol loading. Figure 2 also depicts the maximum altitude of the SO<sub>2</sub> plume over  
13 the period from 23 April 2015 to 31 May 2015. On average the maximum of SO<sub>2</sub> is located in  
14 the lower stratosphere region around 17 km.

15 The SO<sub>2</sub> measurements integrated from midday to midnight obtained from IASI are also used  
16 to describe the transport of the volcanic plume over the southern hemisphere (Figure 3). On  
17 23 April 2015, part of the plume is present nearby Uruguay coast at 17 km and transported by  
18 the general circulation. The plume reached Southern Africa and East side of Madagascar on 1  
19 May 2015 at altitude of 17-18 km and was organized following a cyclonic rolling (Figure 3b).  
20 On 6 May, the plume is mainly located over the Atlantic Ocean near the east coast of South  
21 Africa and partly over Namibia and South Africa. The SO<sub>2</sub> plume extent and amplitude began  
22 to diminish on 11 May 2015 as expected by the oxidation of SO<sub>2</sub> to gaseous sulphuric acid  
23 which further condensed into H<sub>2</sub>SO<sub>4</sub>-H<sub>2</sub>O liquid aerosol. The plume was embedded in a thin  
24 layer between 15-17 km extending from the Atlantic Ocean to the Indian Ocean passing  
25 through the Cape of Good Hope (Fig. 3d).

### 26 3.1.2 Spatial extent of the aerosol plume

27 The transport of the volcanic aerosol plume over the southern hemisphere can be followed by  
28 CALIOP observations at 532 nm. Figure 4 presents the latitude-altitude cross sections of the  
29 scattering ratio observed by CALIOP for 16-day selected periods in 2015. The scattering ratio  
30 values observed during the 16-30 April period (before the eruption) in the Southern  
31 hemisphere, particularly in the lower stratosphere, were in average at 1.05 (not shown).  
32 Between one and three weeks after the eruption (1-16 May period), CALIOP observations  
33 reveal that SR increased until 1.12 in the southern lower stratosphere. The amplitude of the



1 plume during the first weeks following the eruption was higher than the background aerosol  
2 levels at mid-latitudes but was still below the scattering ratio values observed in the tropics.  
3 This could be attributed to possible remnants of the Kelud (7.5°S; 112.2°E; erupted in  
4 February 2014) volcanic aerosol superimposed to the equatorial background aerosol layer.  
5 About one month after the eruption (16-31 May period) the Calbuco plume was much more  
6 pronounced with scattering ratio values (ranging from 1.16 to 1.18) largely above background  
7 levels and greater than aerosol amounts confined in the tropical reservoir. The plume  
8 extended up to about 20 km in altitude and spread over a wide range of latitudes by nearly  
9 reaching 60°S and showing a feature of intrusion into low latitudes, i.e. near 5°S. The rough  
10 center of the plume was therefore slightly norther than the eruption. About one month later on  
11 (16-30 June period), the plume top had moved upward by several hundred meters and was  
12 thicker. The southern hemisphere between 10°S and polar latitudes was full of volcanic  
13 aerosol with scattering ratio values much higher than elsewhere in the whole stratosphere.  
14 About four months after the eruption (16-31 August period) the volcanic aerosol layer was  
15 even thicker with scattering ratio remaining high.

16 In the upper stratospheric transport regime, i.e. in the 21-28 km altitude range, detrainment of  
17 aerosol from the equatorial reservoir appears dependent upon the phase of **the quasi-biennial**  
18 **oscillation (QBO)** and on the intensity of planetary wave activity (Trepte and Hitchman,  
19 1992). When QBO easterlies descend in the tropics, planetary waves are blocked from  
20 entering this region, thus limiting the extent to which these waves may have detrained aerosol  
21 laterally from the tropical reservoir (Trepte et al., 1993). This corresponds to the situation in  
22 Figure 4. However, during the westerly phase of the QBO particles tend to spread poleward  
23 and mixing across the subtropics are expectedly favored, especially in winter (Trepte et al.,  
24 1993). The meridional spread in aerosols amounts shown above 21 km in Figure 4c and 4d  
25 may therefore be consistent with the phase reversal of the QBO from easterlies to westerlies  
26 observed from mid-2015.

## 27 **3.2 Evolution of the aerosols plume over the Reunion site**

### 28 **3.2.1 Ground-based and satellite observations**

29 Figure 5 depicts the evolution of the stratospheric AOD (SAOD) at 532 nm calculated  
30 between 17 and 30 km from the Reunion ground-based lidar and OMPS observations over  
31 Reunion from November 2014 to November 2016. SAOD were calculated from lidar and  
32 OMPS observations at 532 nm using angstrom exponent equal to 1.3 and 1.8 respectively



1 (Schuster et al., 2006; Jäger and Deshler 2002). As expected, an increase in the aerosol  
2 loading was observed over the Reunion site a few weeks after the Calbuco eruption. OMPS  
3 data show a doubling in the SAOD record in comparison with values observed at the end of  
4 2014 and at the beginning of 2015 (Fig. 5). SAOD reached its maximum values (0.014 for  
5 OMPS) at the beginning of June 2015, decreased afterward to 0.01 on August 2015 and went  
6 back to pre-eruption values (0.004-0.006) in April 2016. The lidar record peaks at the same  
7 period, but SAOD values are 1.2 times weaker than those observed by OMPS during the June-  
8 December period. The lidar SAOD observations show less difference with values obtained  
9 prior to the eruption (0.008). Discrepancies between OMPS and lidar were significantly  
10 reduced in April 2016, i.e. with relative difference of 25% and 10% over the January-  
11 December 2015 period and over the April-November 2016 period respectively. The reasons  
12 for these discrepancies are unclear but effects due to different spatial samplings cannot be  
13 excluded. From both datasets an aerosol e-folding of approximately 90 days can be derived,  
14 which is rather close to the value (~80 days) reported for the Sarychev eruption (Jégou et al.,  
15 2013).

16 Figure 6a illustrates the weekly-averaged extinction profiles at 532 nm derived from lidar  
17 measurements over Reunion. This figure reveals a sharp increase of the extinction between 18  
18 and 19 km in May 2015 and reaching its maximum value (greater than  $4 \cdot 10^{-3} \text{ km}^{-1}$ ) in June.  
19 The vertical extent of the plume had increased significantly over the May-July period with a  
20 volcanic aerosol layer spanning from 18 to 21 km. At the beginning of June, the plume was  
21 structured in two layers with the first one centered at 18.5 km and the second one at 20 km  
22 (Fig.6a). We note also a quick decrease in the local extinction around mid-May. The  
23 variability observed in the weekly-averaged extinction profiles and in the vertical extent of the  
24 aerosol signal over the May-July period reflects the presence of transient aerosol layers above  
25 Reunion and indicates that the plume is not homogeneously distributed at this stage. The  
26 altitude of the volcanic aerosol plume and the extinction values decreased from mid-August  
27 onwards. The plume is hence centered around 18 km on September. Overall, the temporal  
28 evolution of the weekly-averaged extinction presents similar general features as the lidar  
29 observations, with maximum values in June and a subsequent gradual decrease of the aerosol  
30 signal. Nevertheless, in OMPS data the plume is smeared out over a wider vertical range than  
31 in the lidar record (Fig. 6b). The vertical and horizontal structures of the plume are not  
32 reproduced in OMPS data. In particular, the decrease in the plume altitude in mid-August is  
33 not observed by OMPS. This can be due to dilution (along the space borne instrument lines of

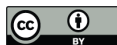

1 sights) of the aerosol signal and vertical resolution issues. The evolution of the scattering ratio  
2 at 532 nm obtained from the lidar and CALIOP space-borne observations during the April-  
3 December 2015 period over the Reunion site are presented on Figure 7. The scattering ratios  
4 from CALIOP have been averaged within  $\pm 5^\circ$  in latitude and  $\pm 50^\circ$  in longitude around  
5 Reunion Island (Fig. 7b). CALIOP observations confirm also the presence of the volcanic  
6 aerosol plume over the Reunion site at the beginning of May 2015 with maximum scattering  
7 ratio values (greater than 1.9) on mid-May 2015. Overall, the aerosol variability is smoother  
8 in CALIOP observations than in the lidar record, which shows more fluctuations in the  
9 altitude of the volcanic plume. Conversely to the lidar and OMPS observations, CALIOP data  
10 do not point out an increase of the vertical extent of the plume and maximum scattering ratio  
11 values at the beginning of June 2015. According to CALIOP, the scattering ratio begin to  
12 decrease at mid-June followed by a slight decrease of the altitude of the plume since the end  
13 of July (Fig 7b). From July onwards, the CALIOP aerosol scattering ratio decreases gradually  
14 with similar values as observed by the lidar.

### 15 **3.2.2 In-situ observations**

16 Four LOAC OPCs were launched over the Reunion site from November 2014 to November  
17 2016. SAOD were calculated at 532 nm following Mie Theory. LOAC observations reveal  
18 also an increase by a factor of 2 in the SAOD on 19 May 2015 ( $1.35 \cdot 10^{-2}$ ). Then SAOD  
19 decrease to  $8.4 \cdot 10^{-3}$  on 19 August 2015 followed by a return to pre-eruption levels on  
20 November 2016 (Fig. 5). Though the SAOD overall evolution derived from LOAC compares  
21 fairly well to OMPS and lidar observations accounting for error bars (Fig. 5), the  
22 discrepancies in terms of SAOD amplitude mainly observed in May could be due to the  
23 different measurement techniques using different spatial and temporal coverages. The  
24 integration time of the LOAC instrument and the ascent velocity of the balloon limit the  
25 vertical resolution on the profile. The in situ data are averaged over 1 minute which tends to  
26 spread out the structure attributed to the volcanic aerosol plume and can explain the difference  
27 with the daily-integrated lidar observations.

28 Figure 8 illustrates the volume concentration ( $dN/d\ln(D)$ ) and number concentration  
29 ( $DV/d\ln(D)$ ) obtained from the LOAC OPC observations over the Reunion site on 19 May  
30 2015 at 1746 UTC. The best fit obtained from LOAC OPC observations reveals an unimodal  
31 lognormal size distribution (Fig. 8). We note that the shape of the size distribution obtained  
32 during the Calbuco event is similar to the results obtained by Kravitz et al. (2011) for the  
33 Sarychev eruption. As suggested by Kravitz et al. (2011) for the Sarychev event, we can also



1 assume that the Calbuco eruption did not eject enough material to create a bimodal structure  
2 over Reunion Island. The effective radius derived from the LOAC OPC on 19 May is  $0.17$   
3  $\pm 0.02$   $\mu\text{m}$  reflecting that the particles observed several weeks after the Calbuco eruption are  
4 quite small. Interestingly, Jégou et al. (2013) have reported that the effective radius obtained  
5 during the Sarychev event ranged from  $0.15$  to  $0.20$   $\mu\text{m}$  more than one month after the  
6 eruption, in agreement with the results of O'Neill et al. (2012). Therefore both eruptions are  
7 comparable in terms of size distribution shape and effective radius. Conversely to the Calbuco  
8 and Sarychev moderate eruptions, bimodal size distributions were observed for the Pinatubo  
9 aerosols on the first weeks after the eruption, the second mode possibly consisting of volcanic  
10 ash (e.g. Russell et al., 1996). Russell et al. (1996) have reported that in the month following  
11 the Pinatubo eruption the effective radius did not differ greatly from pre-eruption values (i.e.  
12  $0.17 \pm 0.07$   $\mu\text{m}$  in their study) possibly because a large number of particles with sizes both  
13 smaller and larger than  $0.17$   $\mu\text{m}$  were injected.

14 The integrated number of particles obtained over 19 size classes from  $0.2$  to  $2$   $\mu\text{m}$  in diameter  
15 is presented in Figure 9. A local aerosol concentration enhancement is detected in the lower  
16 stratosphere ( $16.8$ - $19$  km) over Reunion on 19 May 2015 at 1746 UTC. A maximum  
17 concentration of about 150 particles per  $\text{cm}^3$  (total number of particles:  $730 \pm 130$  particles  
18 ( $\pm 1\sigma$ )) is observed by the aerosol counter for particle sizes larger than  $0.2$   $\mu\text{m}$ . This aerosol  
19 number concentration appears 20 times higher than the one observed by the LOAC flight on  
20 26 November 2014 at 1442 UTC. Few in situ observations are available in the tropical region  
21 to provide a reference state of the background aerosol content. Based on COPAS  
22 measurements (Condensation PArticle counter System, Weigel et al., 2009) on board the M-  
23 55 Geophysica aircraft, Borrmann et al. (2010) found that the aerosol number concentration,  
24 in average, over the lower stratosphere, is ranging from 40 to 100 particles per  $\text{cm}^3$  for sizes  
25 greater than 10 nm in the tropical/subtropical region during the background period. Although  
26 the LOAC size lower bound is limited to 200 nm excluding the detection of the smallest  
27 particles, the observed concentrations on 19 May 2015 are above the levels recorded by the  
28 aircraft pointing out the impact of the Calbuco eruption on the lower stratospheric aerosol  
29 content. Three months later, another LOAC OPC was launched over the Reunion site but the  
30 in situ profile partially shows the volcanic aerosol layer because of a telemetry loss. The  
31 aerosol number concentration obtained on 19 August 2015 at 1300 UTC over Reunion may  
32 reveal a tendency to return to concentration values observed before the eruption (Fig. 9), with  
33 a number concentration of 40 particles per  $\text{cm}^3$  in the lower stratosphere. This tendency is



1 confirmed with the LOAC flight conducted on 2 November 2016 at 2030 UTC with a total  
2 number concentration close to 20 particles per  $\text{cm}^3$  in the lower stratosphere (Fig. 9).

3 The residence time of the aerosol particles in the stratosphere depends on the balance between  
4 the growth processes and the removal processes which are likely to be controlled by the  
5 dynamical context. In the following section, we will discuss the influence of the dynamical  
6 activity on the variability of the volcanic aerosol over the southern hemisphere.

## 7 **4. Dynamical modulation of the aerosol plume**

### 8 **4.1 Long-range isentropic transport**

9 In order to analyze the isentropic transport, the high resolution MIMOSA model has been  
10 used to produce a continuous evolution of PV fields for the period from 1 April 2015 to 31  
11 August 2015. Four advected PV maps, derived for the 400 K isentropic level from the  
12 MIMOSA model, together with dynamical barrier locations derived from the DyBaL code are  
13 superimposed in Figures 10 and 11. The localization of the volcanic aerosol plume obtained  
14 from OMPS observations at  $400 \text{ K} \pm 5 \text{ K}$  isentropic level is also superimposed (Fig. 10 and  
15 11). On 24 April 2015, a significant wave activity is observed, leading to a fairly mixed surf  
16 zone in the  $20^\circ\text{S}$ - $60^\circ\text{S}$  latitude band (not shown). The Calbuco plume is situated inside the  
17 surf zone and the plume was mixed equatorward. On 27 April 2015, the subtropical and mid-  
18 latitude barriers are detected following the Nakamura's formalism (described in Section 2.3)  
19 around  $15^\circ\text{S}$  and  $-40^\circ\text{S}$  in latitude respectively, still limiting the geographical extent of the  
20 plume (Fig. 10a). Figure 10a shows clearly that the plume cannot move beyond the south of  
21 Brazil because of the presence of the subtropical barrier. On 01 May 2015, the air masses  
22 were confined between the two dynamical barriers located in average at  $25^\circ\text{S}$  and  $40^\circ\text{S}$  in  
23 latitude respectively. The air masses were advected eastward between South Africa and  
24 Madagascar following the wave shape of the barrier, in consistency with the OMPS  
25 observations near South Africa (Fig. 10b). The subtropical barrier previously located in  
26 average at  $25^\circ\text{S}$  moved northward crossing South Africa. The air masses containing aerosol  
27 previously situated in the south side of Madagascar were transported northward and eastward  
28 following the displacement of the barrier and reached the Reunion site.

29 On 19 May 2015, we note the presence of the subtropical and mid-latitude barriers around  
30  $28^\circ\text{S}$  and  $43^\circ\text{S}$  respectively. (Fig. 11a). As expected, the volcanic aerosol plume was confined  
31 between the two dynamical barriers and embedded eastward. At this stage, the presence of the  
32 subtropical barrier and the polar vortex seems to drive significantly the Calbuco plume



1 inducing its transport eastward. Between end of May and beginning of June, the subtropical  
2 barrier has dissipated while the polar vortex was around  $\sim 40^{\circ}\text{S}$  (see Fig. 11b). The OMPS  
3 observations reveal that the most part of the plume was located over the southern African and  
4 the Indian Ocean region in June (Fig. 11b). On the following months of July and August, the  
5 polar vortex is clearly identified at  $60^{\circ}\text{S}$  which is a classical pattern for the austral winter.

#### 6 **4.2 Removal processes**

7 As shown above, in the lower stratosphere distributions of the aerosol are modulated (or  
8 mostly driven) by isentropic transport. However, particle removal processes should be  
9 considered. Based on a semi-Lagrangian transport model, Chen et al. (1994) showed that  
10 isentropic mass exchange between tropical and extratropical latitudes in the stratosphere can  
11 act as a significant removal process of stratospheric aerosols. Depending on the strength of the  
12 Brewer-Dobson circulation, stratospheric materials such as aerosols can be rapidly transported  
13 from the tropics to high latitudes (Dhomse et al., 2006, 2014).

14 Dhomse et al. (2014) using the CCM model (UM-UKCA) have revealed the influence of STE  
15 events on the budget of the stratospheric aerosols. In particular, they showed that  
16 overestimation of the strength of a STE event could lead to fast removal of aerosols from  
17 stratosphere into the middle and high latitude. Moreover, Hamill et al. (1997) reported that  
18 STE through the isentropic surfaces due to Rossby wave activity can be considered as a  
19 significant dynamical process for removal of stratospheric aerosol. Sixteen years of ozone  
20 measurements (1992–2006) at Reunion have been processed to detect stratospheric signatures  
21 on each single ozone profile by Clain et al. (2010). They shown that the STE occurred  
22 frequently all the year at Reunion and strongly linked to dynamical processes occurred near to  
23 tropopause such as tropopause fold. Given the potential of a STE event to impact the  
24 stratospheric aerosol loading, we cannot exclude its contribution (even though small) on the  
25 stratospheric aerosols loading at Reunion.

26 The modulation of the plume over Reunion could be also caused by particle removal  
27 processes such sedimentation which is considered as the primary loss mechanism of  
28 stratospheric aerosol or by dilution of the stratospheric plume (Hamill et al, 1997; Rasch et  
29 al., 2008). Nevertheless, the sedimentation of aerosol is an effective removal mechanism for  
30 the few particles that somehow survive long enough in the stratosphere to grow to larger sizes  
31 (Hamill et al., 1997). We note also that larger particles fall faster, which causes a vertical  
32 gradient in the particle size distribution (Mann et al., 2015). However, highlighting



1 sedimentation processes from Figures 6 and 7 is somewhat complicated by the transient  
2 feature of the volcanic aerosols with variable plume altitudes especially from the lidar local  
3 data.

## 4 **5. Summary and conclusion**

5 The long-range isentropic transport of the volcanic aerosol produced following the Calbuco  
6 eruption was examined. The analysis focuses on the dynamical context which led to the  
7 spread of the aerosol plume over Indian Ocean between April 2015 and November 2016. The  
8 transport of the volcanic aerosols to the Indian Ocean was investigated by combining satellite  
9 (CALIOP, IASI, OMPS), and ground-based experiments: Optical Particle Counter (LOAC)  
10 and lidar, in addition to numerical tools: the DyBal code and the high resolution MIMOSA  
11 model.

12 From the IASI observations, the amounts of SO<sub>2</sub> injected into the atmosphere during the  
13 Calbuco eruption have been quantified. SO<sub>2</sub> amounts emitted by the Calbuco eruption were  
14 about two times lower than for the Sarychev moderate eruption in the northern hemisphere in  
15 June 2009, but we report the same e-folding time for both eruptions, i.e. ~11 days (Jégou et  
16 al., 2013; Kravitz et al., 2011). It is found from CALIOP observations that the Calbuco  
17 aerosol layer was observable up to lower stratosphere, between 18 and 21 km, and spreaded  
18 exclusively over the Southern Hemisphere. Moreover, OMPS observations reveal that the  
19 Calbuco plume reached the Indian Ocean **two weeks after the eruption**. It is shown from  
20 ground-based observations deployed at Reunion Island that SAOD increased by a factor of ~2  
21 by the beginning of May 2015 and decreased afterward and returned to pre-eruption values by  
22 November 2016. The aerosol e-folding time is estimated to be ~90 days, i.e. close to the ~80  
23 days reported for the Sarychev eruption (Jégou et al., 2013). Though the various datasets  
24 rather agree in terms of aerosol signal intensity we report significant differences for the plume  
25 height and its variability possibly as a result of different observations geometries, resolutions  
26 and spatial scales inherent to each instrument.

27 In situ measurements by the LOAC OPC have pointed out the impact of the Calbuco eruption  
28 on the lower stratospheric aerosol content over the Reunion site. Aerosol number  
29 concentrations were 20 times higher than values observed before and one year after the  
30 eruption. On May 2015, the volcanic aerosol was characterized by an effective radius of 0.16  
31 ±0.02 μm and an unimodal lognormal size distribution. These microphysical characteristics



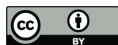

1 are in agreement with previous studies focussing on the Sarychev eruption (Kravitz et al.,  
2 2011; Jégou et al., 2013).

3 Through the use of the MIMOSA model and the DyBAL code, it was clearly identified that  
4 the transport of the volcanic aerosols was eastward mainly in form of planetary-scale tongues.  
5 In particular, the combination of MIMOSA and DyBal simulations revealed that the transport  
6 of the volcanic aerosol plume eastward was controlled and confined between the subtropical  
7 barrier and polar vortex. The two dynamical barriers acted as a channel within which most of  
8 zonal transport took place, including transport of Calbuco plume. Our results support the  
9 assumption that the processes explaining the structure of the plume over the southern  
10 hemisphere had mainly a dynamical origin. Thus, the fluctuation of the localization of the  
11 dynamical barrier induced transient aerosol layers above Reunion and an inhomogeneous  
12 distribution of the plume between May and July 2015. The present study supports also the  
13 assumption that the modulation of a volcanic plume may result from the contribution of both  
14 dynamical and microphysical processes. Fully understanding the contribution of the  
15 microphysical processes on the evolution of the volcanic plume over the southern hemisphere  
16 requires further investigation. This will be examined in a forthcoming study.

17



1

## 2 **Acknowledgements**

3 This work is supported by the Labex « Étude des géofluides et des VOLatils–Terre,  
4 Atmosphère et Interfaces - Ressources et Environnement (VOLTAIRE) (ANR-10-LABX-  
5 100-01). This study is integrated and supported by the LEFE project SATORI (Stratospheric  
6 Aerosols in the Tropic Observed from Reunion Island). The authors thank the LPC2E and  
7 UMS balloon launching team for their technical collaboration. We would especially like to thank  
8 the staff of the team working on the lidar systems at the Maïdo observatory. Lieven Clarisse is a  
9 research associate with the Belgian FNRS-F.R.S. The authors thank also the CALIOP team and Jean-  
10 Paul Vernier for processing and providing data. We are also grateful to the CCUR team for the  
11 use of the TITAN supercomputer.

12



## 1 **References**

- 2 Arfeuille, F., B. P. Luo, P. Heckendorn, D. Weisenstein, J. X. Sheng, E. Rozanov, M.  
3 Schraner, S. Brönnimann, L.W. Thomason, and T. Peter: Modeling the stratospheric warming  
4 following the Mt. Pinatubo eruption: uncertainties in aerosol extinctions, *Atmos. Chem.*  
5 *Phys.*, 13, 11221–11234, 2013.
- 6 Baray, J. L., Courcoux, Y., Keckhut, P., Portafaix, T., Tulet, P., Cammas, J. P., ... & Desmet,  
7 F. (2013). Maïdo observatory: a new high-altitude station facility at Reunion Island (21° S,  
8 55° E) for long-term atmospheric remote sensing and in situ measurements. *Atmospheric*  
9 *Measurement Techniques*, 6(10), 2865-2877.
- 10 Bauman, J. J., Russell, P. B., Geller, M. A. and Hamill, P. : A stratospheric aerosol  
11 climatology from SAGE II and CLAES measurements: 2. Results and comparisons, 1984–  
12 1999. *J. Geophys. Res.* 108, 4383. (doi:10.1029/2002JD002993, 2003
- 13 Bekki, S : On the possible role of aircraft-generated soot in the middle latitude ozone  
14 depletion, *J. Geophys. Res.*, 102, 10,751-10,758, 1997
- 15 Bencherif, H., Portafaix, T., Baray, J. L., Morel, B., Baldy, S., Leveau and J., Diab, R. :  
16 LIDAR observations of lower stratospheric aerosols over South Africa linked to large scale  
17 transport across the southern subtropical barrier. *Journal of atmospheric and solar-terrestrial*  
18 *physics*, 65(6), 707-715, 2003
- 19 Bencherif, H., Amraoui, L. E., Semane, N., Massart, S., Charyulu, D. V., Hauchecorne, A.,  
20 and Peuch, V. H., Examination of the 2002 major warming in the southern hemisphere using  
21 ground-based and Odin/SMR assimilated data: stratospheric ozone distributions and  
22 tropic/mid-latitude exchange. *Canadian Journal of Physics*, 85(11), 1287-1300, 2007
- 23 Bluth, G. J. S., Doiron, S. D., Schnetzler, C. C., Krueger, A. J., and Walter, L. S.: Global  
24 tracking of the SO<sub>2</sub> clouds from the June 1991 Mount Pinatubo eruptions, *Geophys. Res.*  
25 *Lett.*, 19, 151–154, doi:10.1029/91GL02792, 1992.
- 26 Borrmann, S., Solomon, S., Dye, J. E., Baumgardner, D., Kelly, K.K., and Chan, K. R.:  
27 Heterogeneous reactions on stratospheric background aerosols, volcanic sulfuric acid droplets,  
28 and type I PSCs: The effects of temperature fluctuations and differences in particle phase, *J.*  
29 *Geophys. Res.*, 102, 3639–3648, 1997.
- 30 Bourassa, A. E., D. A. Degenstein, B. J. Elash, and E. J. Llewellyn : Evolution of the  
31 stratospheric aerosol enhancement following the eruptions of Okmok and Kasatochi:



- 1 Odin-OSIRIS measurements, *J. Geophys. Res.*, 115, D00L03, doi:10.1029/2009JD013274,
- 2 2010
- 3 Bourassa, A. E., McLinden, C. A., Bathgate, A. F., Elash, B. J., and Degenstein, D. A.:
- 4 Precision estimate for Odin-OSIRIS limb scatter retrievals, *J. Geophys. Res.*, 117, D04303,
- 5 doi:10.1029/2011JD016976, 2012
- 6 Canty, T., Mascioli, N. R., Smarte, M. D., & Salawitch, R. J. (2013). An empirical model of
- 7 global climate-Part 1: A critical evaluation of volcanic cooling. *Atmospheric Chemistry and*
- 8 *Physics*, 13(8), 3997.
- 9 Carn, S., L. Clarisse, and A. J. Prata : Multi-decadal satellite measurements of global
- 10 volcanic degassing, *J. Volcanol. Geotherm. Res.*, 99-134, 2016
- 11 Chen, P., J. R. Holton, A. O'Neill, and R. Swinbank, 1994: Isentropic mass exchange between
- 12 the Tropics and extratropics in the stratosphere. *J. Atmos. Sci.*, **51**, 3006–3018.
- 13 Clain, G., Baray, J. L., Delmas, R., Keckhut, P and Cammas, J. P : A lagrangian approach to
- 14 analyse the tropospheric ozone climatology in the tropics: Climatology of stratosphere–
- 15 troposphere exchange at Reunion Island. *Atmospheric environment*, 44(7), 968-975, 2010
- 16 Clarisse, L., Coheur, P. F., Prata, A. J., Hurtmans, D., Razavi, A., Phulpin, T., Hadji-Lazaro,
- 17 J., and Clerbaux, C.: Tracking and quantifying volcanic SO<sub>2</sub> with IASI, the September 2007
- 18 eruption at Jebel at Tair, *Atmos. Chem. Phys.*, 8, 7723-7734, doi:10.5194/acp-8-7723-2008,
- 19 2008.
- 20 Clarisse, L., Hurtmans, D., Clerbaux, C., Hadji-Lazaro, J., Ngadi, Y., and Coheur, P.-F.:
- 21 Retrieval of sulphur dioxide from the infrared atmospheric sounding interferometer (IASI),
- 22 *Atmos. Meas. Tech.*, 5, 581–594, doi:10.5194/amt-5-581-2012, 2012.
- 23 Clarisse, L., Coheur, P. F., Theys, N., Hurtmans, D. and Clerbaux, C.: The 2011 Nabro
- 24 eruption, a SO<sub>2</sub> plume height analysis using IASI measurements. *Atmospheric chemistry and*
- 25 *physics*, 14(6), 3095-3111, 2014
- 26 Clerbaux, C., Boynard, A., Clarisse, L., George, M., Hadji-Lazaro, J., Herbin, H. and Wespes,
- 27 C. Monitoring of atmospheric composition using the thermal infrared IASI/MetOp sounder.
- 28 *Atmospheric Chemistry and Physics*, 9(16), 6041-6054, 2009



- 1 Dhomse, S., Weber, M., Wohltmann, I., Rex, M., and Burrows, J. P., On the possible causes  
2 of recent increases in northern hemispheric total ozone from a statistical analysis of satellite  
3 data from 1979 to 2003. *Atmospheric Chemistry and Physics*, 6(5), 1165-1180, 2006
- 4 Dhomse, S. S., Emmerson, K. M., Mann, G. W., Bellouin, N., Carslaw, K. S., Chipperfield,  
5 M. P. and Dalvi, M. , Aerosol microphysics simulations of the Mt.~ Pinatubo eruption with  
6 the UM-UKCA composition-climate model. *Atmospheric Chemistry and Physics*, 14(20),  
7 11221-11246, 2014
- 8 Fairlie, T. D., J. P. Vernier, M. Natarajan, and K. M. Bedka (2014), Dispersion of the Nabro  
9 volcanic plume and its relation to the Asian summer monsoon, *Atmos. Chem. Phys.*, 14(13),  
10 7045-7057, doi:10.5194/acp-14-7045-2014.
- 11 Froyd, K. D., D. M. Murphy, T. J. Sanford, D. S. Thomson, J. C. Wilson, L. Pfister, and L.  
12 Lait : Aerosol composition of the tropical upper troposphere, *Atmos. Chem. Phys.*, 9, 4363-  
13 4385, 2009
- 14 Fussen, D., F. Vanhellefont and C. Bingen, Evidence of transport, sedimentation and  
15 coagulation mechanisms in the relaxation of post-volcanic stratospheric aerosols, *Ann.*  
16 *Geophys.*, 19, 1157-1162, 2001
- 17 Gorkavyi, N., D. F. Rault, P. A. Newman, A. M. d. Silva, and A. E. Dudorov : New  
18 stratospheric dust belt due to the Chelyabinsk bolide, *Geophys. Res. Lett.*, 40(17), 47284733,  
19 doi:10.1002/grl.50788, 2013
- 20 Grant, W. B., Browell, E. V., Fishman, J., Brackett, V. G., Veiga, R. E., Nganga, D., .Long,  
21 C. S. : Aerosol-associated changes in tropical stratospheric ozone following the eruption of  
22 Mount Pinatubo. *Journal of Geophysical Research: Atmospheres*, 99(D4), 8197-8211, 1994
- 23 Grant, W. B., E. V. Browell, C. S. Long, L. L. Stowe, R. G. Grainger, and A. Lambert : Use of  
24 volcanic aerosols to study the tropical stratospheric reservoir. *J. Geophys. Res.*, **101**, 3973-  
25 3988, 1996
- 26 Hauchecorne, A., Godin, S., Marchand, M., Heese, B., and Souprayen, C. Quantification of  
27 the transport of chemical constituents from the polar vortex to midlatitudes in the lower  
28 stratosphere using the high-resolution advection model MIMOSA and effective diffusivity.  
29 *Journal of Geophysical Research: Atmospheres*, 107(D20), 2002



- 1 Heese, B., Godin, S and Hauchecorne, A : Airborne lidar measurements of ozone filaments  
2 during METRO–A validation of PV advection model MIMOSA. *J. Geophys. Res.*, 106, 20-  
3 011, 2001
- 4 Hommel, R., Timmreck, C., Giorgetta, M. A. and Graf, H. F. (2015). Quasi-biennial  
5 oscillation of the tropical stratospheric aerosol layer. *Atmospheric Chemistry and Physics*,  
6 15(10), 5557, 2015
- 7 Jaross, G., Chen, G., Kowitt, M., Warmer, J., Xu, P., Kelly, T. and Flittner, D : Suomi NPP  
8 OMPS Limb Profiler initial sensor performance assessment. In SPIE asia-Pacific Remote  
9 Sensing (pp. 852805-852805), International Society for Optics and Photonics, 2012
- 10 Junge, C. E., Chagnon, C. W., & Manson, J. E. (1961). Stratospheric aerosols. *Journal of*  
11 *Meteorology*, 18(1), 81-108.
- 12 Kinnison, D. E., K. E. Grant, P. S. Connell, D. A. Rotman, and D. J. Wuebbles (1994), The  
13 chemical and radiative effects of the Mount Pinatubo eruption, *J. Geophys. Res.*, 99(D12),  
14 25705–25731, doi:[10.1029/94JD02318](https://doi.org/10.1029/94JD02318).
- 15 Klett, J. D : Stable analytical inversion solution for processing lidar returns, *Appl. Opt.*, 20,  
16 211 – 220, 1981
- 17 Kravitz, B., Robock, A., and Bourassa, A.: Negligible climatic effects from the 2008 Okmok  
18 and Kasatochi volcanic eruptions, *J. Geophys. Res.*, 115, D00L05, oi:10.1029/2009JD013525,  
19 2010.
- 20 Kravitz, B., Robock, A., Bourassa, A., Deshler, T., Wu, D., Mattis, I., Finger, F., Hoffmann,  
21 A., Ritter, C., Bitar, L., Duck, T. J., and Barnes, J. E.: Simulation and observations of  
22 stratospheric aerosols from the 2009 Sarychev volcanic eruption, *J. Geophys. Res.*, 116,  
23 D18211, doi:10.1029/2010JD015501, 2011.
- 24 Kravitz, B., Robock, A., Shindell, D. T. and Miller, M. A.. Sensitivity of stratospheric  
25 geoengineering with black carbon to aerosol size and altitude of injection. *Journal of*  
26 *Geophysical Research: Atmospheres*, 117(D9), 2002
- 27 Kremser, S., Thomason, L. W., Hobe, M., *et al.* Stratospheric aerosol—Observations,  
28 processes, and impact on climate. *Reviews of Geophysics*, vol. 54, no 2, p. 278-335, 2016
- 29 Hamill, P., Jensen, E. J., Russell, P. B., and Bauman, J.J.: The life cycle of stratospheric  
30 aerosol particles, *B. Am. Meteorol. Soc.*, 78, 1395–1410, doi:10.1175/1520-  
31 0477(1997)078<1395:TLCOSA>2.0.CO;2, 1997.

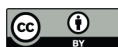

- 1 Krotkov, N. A., M. R. Schoeberl, G. A. Morris, S. Carn, and K. Yang : Dispersion and  
2 lifetime of the SO<sub>2</sub> cloud from the August 2008 Kasatochi eruption, *J. Geophys. Res.*, 115,  
3 doi:10.1029/2010jd013984, 2010
- 4 Hermann, M., J. Heintzenberg, A. Wiedensohler, A. Zahn, G. Heinrich, and C. A. M.  
5 Brenninkmeijer, Meridional distributions of aerosol particle number concentrations in the  
6 upper troposphere and lower stratosphere obtained by Civil Aircraft for Regular Investigation  
7 of the Atmosphere Based on an Instrument Container (CARIBIC) flights, *J. Geophys. Res.*,  
8 108(D3), 4114, doi:10.1029/2001JD001077, 2003.
- 9 Hofmann, D., Barnes, J., O'Neill, M., Trudeau, M., and Neely, R.: Increase in background  
10 stratospheric aerosol observed with lidar at Mauna Loa Observatory and Boulder, Colorado,  
11 *Geophys. Res. Lett.*, 36, L15808, doi:10.1029/2009GL039008, 2009.
- 12 Hitchman, M. H., M. McKay and C. R. Trepte (1994), A climatology of stratospheric aerosol,  
13 *J. Geophys. Res.*, 99, 20,689-20,700.
- 14 Jäger, H., and T. Deshler, Lidar backscatter to extinction, mass and area conversions for  
15 stratospheric aerosols based on midlatitude balloonborne size distribution  
16 measurements, *Geophys. Res. Lett.*, 29(19), 1929, doi:10.1029/2002GL015609, 2002.
- 17 Jégou, F., Berthet, G., Brogniez, C., Renard, J. B., François, P., Haywood, J. M. and Godin-  
18 Beekmann, S. (2013). Stratospheric aerosols from the Sarychev volcano eruption in the 2009  
19 Arctic summer. *Atmospheric Chemistry and Physics*, 13(13), 6533-6552.
- 20 Labitzke, K. and McCormick, M.: Stratospheric temperature increases due to Pinatubo  
21 aerosols, *Geophys. Res. Lett.*, 19, 207–210, 1992.
- 22 Lurton, T., Renard, J.-B., Vignelles, D., Jeannot, M., Akiki, R., Mineau, J.-L. and Tonnelier,  
23 T.: Light scattering at small angles by atmospheric irregular particles: modelling and  
24 laboratory measurements, *Atmos., Meas. Tech.*, 7, 931-939, 2014.
- 25 McCormick, M. P., Thomason, L. W., and Trepte, C. R.: Atmospheric effects of the Mt  
26 Pinatubo eruption, *Nature*, 373, 399–404, 1995.
- 27 Morel, B., Bencherif, H., Keckhut, P., Portafaix, T., Hauchecorne, A., and Baldy, S.,  
28 Fine-scale study of a thick stratospheric ozone lamina at the edge of the southern subtropical  
29 barrier: 2. Numerical simulations with coupled dynamics models. *Journal of Geophysical*  
30 *Research: Atmospheres*, 110(D17), 2005



- 1 Nakamura, N., Two-dimensional mixing, edge formation, and permeability diagnosed in an  
2 area coordinate. *Journal of the atmospheric sciences*, 53(11), 1524-1537, 1996
- 3 Neely, R. R., P. Yu, K. H. Rosenlof, O. B. Toon, J. S. Daniel, S. Solomon, and H. L. Miller  
4 (2014), The contribution of anthropogenic SO<sub>2</sub> emissions to the Asian tropopause aerosol  
5 layer, *J. Geophys. Res.*, 119(3), 1571-1579, doi:10.1002/2013JD020578.
- 6 O'Neill, N. T., Perro, C., Saha, A., Lesins, G., Duck, T. J., Eloranta, E. W and Bourassa, A :  
7 Properties of Sarychev sulphate aerosols over the Arctic. *Journal of Geophysical Research:*  
8 *Atmospheres*, 117(D4), 2012
- 9 Portafaix, T., Morel, B., Bencherif, H., Baldy, S., Godin-Beekmann, S., and Hauchecorne,  
10 A.. Fine-scale study of a thick stratospheric ozone lamina at the edge of the southern  
11 subtropical barrier. *Journal of Geophysical Research: Atmospheres*, 108(D6), 2003
- 12 Pueschel, R. F., Snetsinger, K. G., Russell, P. B., Kinne, S. A., & Livingston, J. M : The  
13 effects of the 1991 Pinatubo volcanic eruption on the optical and physical properties of  
14 stratospheric aerosols. *Proceedings of IRS92: Current Problems in Atmospheric Radiation*,  
15 183-186, 1992
- 16 Rasch, P. J., Tilmes, S., Turco, R. P., Robock, A., Oman, L., Chen, C. C. J. and Garcia, R. R.,  
17 An overview of geoengineering of climate using stratospheric sulphate aerosols.  
18 *Philosophical Transactions of the Royal Society of London A: Mathematical, Physical and*  
19 *Engineering Sciences*, 366(1882), 4007-4037, 2008
- 20 Randel, W. J., Gille, J. C., Roche, A. E., Kumer, J. B., Mergenthaler, J. L., Waters, J. W. and  
21 Lahoz, W. A. (1993). Stratospheric transport from the tropics to middle latitudes by planetary-  
22 wave mixing. *Nature*, 365(6446), 533-535.
- 23 Rault, D.F and Loughmann,R.P : The OMPS Limb Profiler environmental data record  
24 algorithm theoretical basis document and expected performance, *IEEE Transactions on*  
25 *Geoscience and Remote Sensing*, 51(5), 2505-2527, 2013
- 26 Renard, J.B., Dulac, F., Berthet, G., Lurton, T., Vignelles, D., Jégou, F., Tonnelier, T.,  
27 Thaury, C., Jeannot, M., Couté, B., Akiki, R., Verdier, N., Mallet, M., Gensdarmes, F.,  
28 Charpentier, P., Duverger, V., Dupont, J.V., Mesmin, S., Elias, T., Crenn, V., Sciare, J.,  
29 Giacomoni, J., Gobbi, M., Hamonou, E., Olafsson, H., Dagsson-Waldhauserova, P., Camy-  
30 Peyret, C., Mazel, C., Décamps, T., Piringer, M., Surcin, J., and Daugeron, D.: LOAC: a  
31 small aerosol optical counter/sizer for ground-based and balloon measurements of the size





- 1 distribution and nature of atmospheric particles – Part 1: Principle of measurements and  
2 intercomparison campaigns, *Atmos. Meas. Tech.*, 9, 1721–1742, doi:10.5194/amt-9-1721-  
3 2016, 2016.
- 4 Ridley, D. A., et al. : Total volcanic stratospheric aerosol optical depths and implications for  
5 global climate change, *Geophys. Res. Lett.*, 41(22), 7763–7769, doi:10.1002/2014GL061541,  
6 2014
- 7 Russell, P. B., Livingston, J. M., Pueschel, R. F., Bauman, J. J., Pollack, J. B., Brooks, S. L.  
8 and Dutton, E. G. (1996). Global to microscale evolution of the Pinatubo volcanic aerosol  
9 derived from diverse measurements and analyses. *Journal of Geophysical Research:*  
10 *Atmospheres*, 101(D13), 18745–18763.
- 11 Sasano, Y., Browell, E. V. and Ismail, S: Error caused by using a constant  
12 extinction/backscattering ratio in the lidar solution. *Applied Optics*, 24(22), 3929–3932, 1985
- 13 Sawamura, P., Vernier, J. P., Barnes, J. E., Berkoff, T. A., Welton, E. J., Alados-Arboledas,  
14 L. and Lange, D. (2012). Stratospheric AOD after the 2011 eruption of Nabro volcano  
15 measured by lidars over the Northern Hemisphere. *Environmental Research Letters*, 7(3),  
16 034013.
- 17 Siddaway, J. M., and S. V. Petelina (2010), Transport and evolution of the 2009 Australian  
18 Black Saturday bushfire smoke in the lower stratosphere observed by OSIRIS on Odin, *J.*  
19 *Geophys. Res.*, 116, doi:10.1029/2010JD015162.
- 20 Solomon, S., Portmann, R. W., Garcia, R. R., Thomason, L. W., Poole, L. R., and McCormick,  
21 M. P.: The role of aerosol variations in anthropogenic ozone depletion at northern  
22 midlatitudes, *J. Geophys. Res.-Atmos.*, 101, 6713–6727, 1996.
- 23 Solomon, S., Stratospheric ozone depletion: A review of concepts and history, *Rev. Geophys.*,  
24 37, 275–316, doi:10.1029/1999RG900008, 1999
- 25 Solomon, S., Daniel, J. S., Neely III, R. R., Vernier, J.-P., Dutton, E. G., and Thomason, L.  
26 W.: The persistently variable ”Background”stratospheric aerosol layer and global climate  
27 change, *Science* 333, 866, doi:10.1126/science.1206027, 2011.
- 28 SPARC 2006 Assessment of stratospheric aerosol properties (ASAP). Technical report  
29 WCRP-124/WMO/TD-No. 1295/SPARC report no. 4, SPARC, Toronto, Ontario, CA, pp.  
30 322.

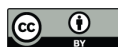

- 1 Stenchikov, G. L., Kirchner, I., Robock, A., Graf, H. F., Antuna, J. C., Grainger, R. G.,  
2 Lambert, A. & Thomason, L. 1998 Radiative forcing from the 1991 Mount Pinatubo volcanic  
3 eruption conditions. *J. Geophys. Res.* 103, 13 837–13 857. (doi:10.1029/98JD00693)
- 4 Stenchikov, G., A. Robock, V. Ramaswamy, M. D. Schwarzkopf, K. Hamilton, and S.  
5 Ramachandran, Arctic Oscillation response to the 1991 Mount Pinatubo eruption: Effects of  
6 volcanic aerosols and ozone depletion, *J. Geophys. Res.*, 107(D24), 4803,  
7 doi:10.1029/2002JD002090, 2002.
- 8 Schuster, G. L., O. Dubovik, and B. N. Holben : Angstrom exponent and bimodal aerosol size  
9 distributions, *J. Geophys. Res.*, 111, D07207, doi:10.1029/2005JD006328, 2006
- 10 Thomason, L. W., Pitts, M. C., & Winker, D. M. (2007). CALIPSO observations of  
11 stratospheric aerosols: a preliminary assessment. *Atmospheric Chemistry and Physics*, 7(20),  
12 5283-5290.
- 13 Thomason, L. W., S. P. Burton, B.-P. Luo and T. Peter , SAGE II measurements of  
14 stratospheric aerosol properties at non-volcanic levels, *Atmos. Chem. Phys.*, 8, 983-995, 2008
- 15 Trepte, C. R., and Hitchman, M. H.: Tropical stratospheric circulation deduced from satellite  
16 aerosol data, *Nature*, Vol. 355, 626-628, 1992.
- 17 Trepte, C. R., Veiga, R. E., and McCormick, M. P. : The poleward dispersal of Mount  
18 Pinatubo volcanic aerosol, *J. Geophys. Res.*, vol. 98, No. D10, 18,563-18,573, 1993.
- 19 Vernier, J. P., Pommereau, J. P., Garnier, A., Pelon, J., Larsen, N., Nielsen, J., and  
20 McDermid, I. S., Tropical stratospheric aerosol layer from CALIPSO lidar observations.  
21 *Journal of Geophysical Research: Atmospheres*, 114(D4), 2009
- 22 Vernier, J.-P., Thomason, L. W., Pommereau, J.-P., Bourassa, A., Pelon, J., Garnier, A.,  
23 Hauchecorne, A., Blanot, L., Trepte, C., Degenstein, D., and Vargas, F.: Major influence of  
24 tropical volcanic eruptions on the stratospheric aerosol layer during the last decade, *Geophys.*  
25 *Res. Lett.*, 38, L12807, doi:10.1029/2011GL047563, 2011.
- 26 Winker, D., Vaughan, M., Omar, A., Hu, Y., Powell, K., Liu, Z., Hunt, Wand Young, S :  
27 Overview of the calipso mission and caliop data processing algorithms, *J. Atmos.* 1139  
28 *Oceanic Technol.*, 26, 2310–2323, 2009
- 29 Vignelles, D. : Caractérisation des performances du nouveau mini compteur de particule  
30 LOAC embarqué sous ballon météorologique : application à l'étude de la variabilité spatiale



- 1 et temporelle des aérosols de la haute troposphère et de la stratosphère - PhD Thesis, Univ.
- 2 Orléans, 2016
  
- 3 Weigel, R., Hermann, M., Curtius, J., Voigt, C., Walter, S., Böttger, T and Borrmann, S :
- 4 Experimental characterization of the CONDensation PArticle counting System for high altitude
- 5 aircraft-borne application. *Atmospheric Measurement Techniques*, 2, 243-258, 2009
  
- 6 Wunderlich, F. and Mitchell, D. M : Revisiting the observed surface climate response to large
- 7 volcanic eruptions. *Atmospheric Chemistry and Physics*, 17(1), 485-499, 2017
  
- 8 Xu, W., Jónsson, S., Ruch, J. and Aoki, Y : The 2015 Wolf volcano (Galápagos) eruption
- 9 studied using Sentinel-1 and ALOS-2 data. *Geophysical Research Letters*, 43(18), 9573-9580,
- 10 2016
  
- 11



1  
2  
3  
4  
5  
6

## FIGURES AND TABLES

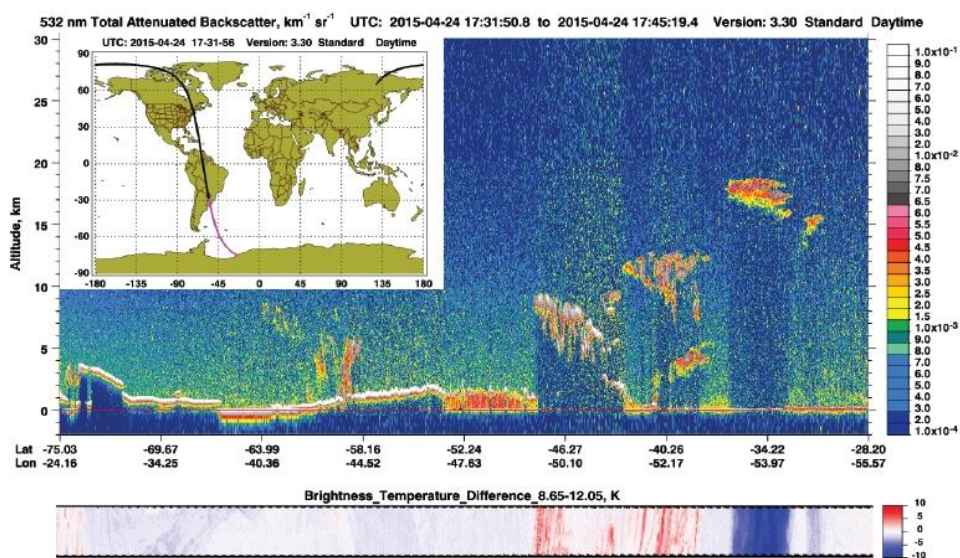

7  
8  
9  
10  
11  
12  
13  
14

**Figure 1** : CALIOP cross-section of 532 nm attenuated backscatter for the overpass at 1730-1745 on 24 April 2015.



1  
2  
3  
4  
5  
6  
7

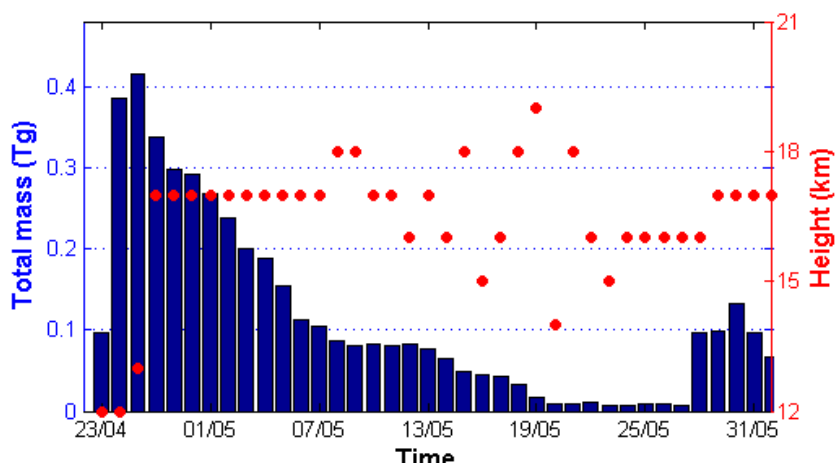

8  
9  
10  
11

**Figure 2 :** Evolution of the SO<sub>2</sub> total mass (in blue) and the height of the maximum SO<sub>2</sub> mass obtained from IASI from 23 April 2015 to 31 May 2015 over the Southern Hemisphere.



1  
2  
3  
4

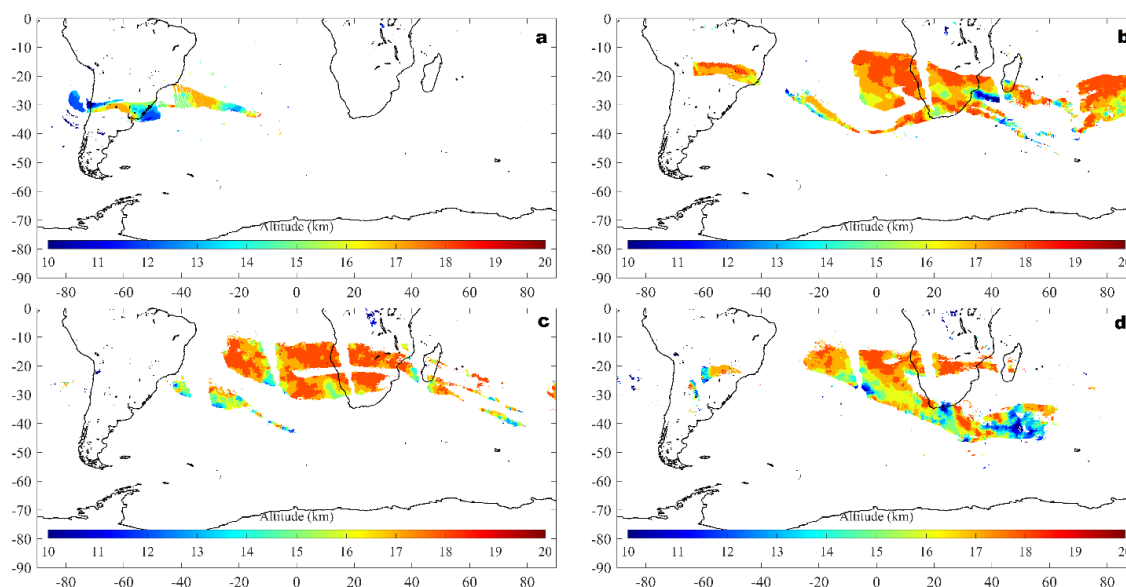

5 **Figure 3 : Height injection(in km) and transport of SO<sub>2</sub> obtained from IASI observations**  
6 *during (a) 24/04, (b) 01/05, (c) 06/05 and (d) 11/05*

7  
8  
9



1  
2

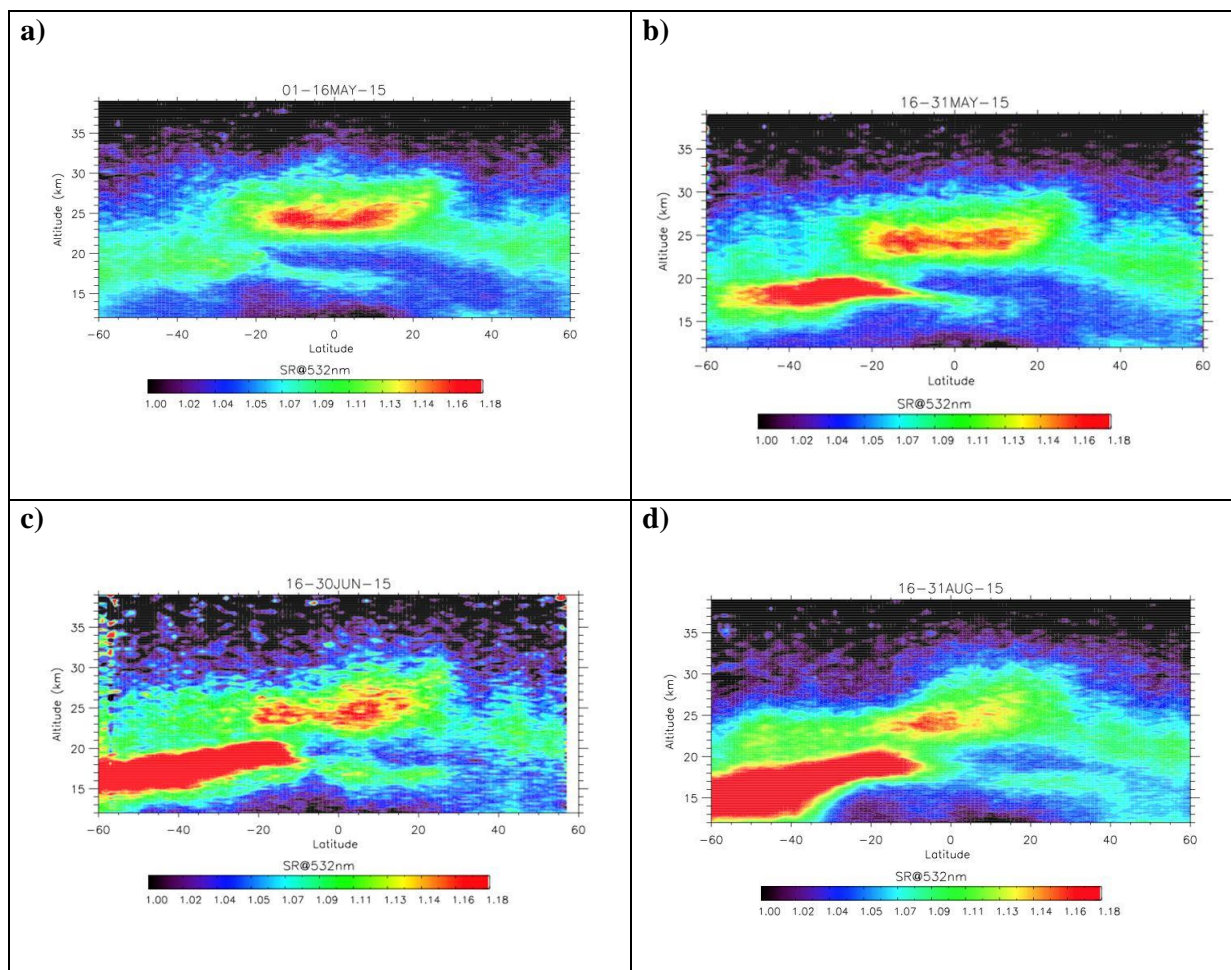

3 **Figure 4 :** Half monthly mean of the zonal scattering ratio at 532 nm in (a) 1-15 May, (b) 16-  
4 31 May, (c) 16-30 June and (d) 16-31 August.

5  
6  
7  
8  
9



1

2

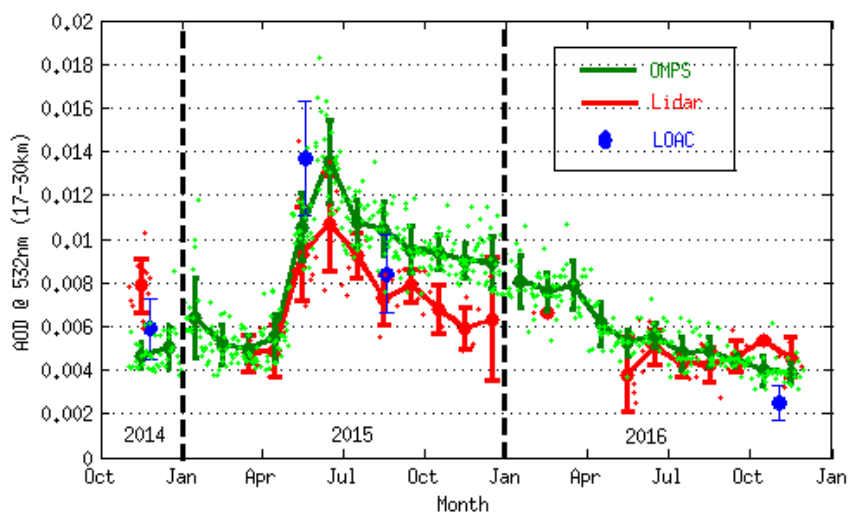

3

4 **Figure 5 :** Evolution of AOD calculated between 17 and 30 km at 532 nm obtained from lidar  
5 (red), LOAC OPC (blue) and OMPS (green) observations between November 2014 to  
6 November 2016 over the Reunion site. The small dots represent the daily AOD and the large  
7 dots represent the monthly averaged AOD obtained from the devices.

8





1

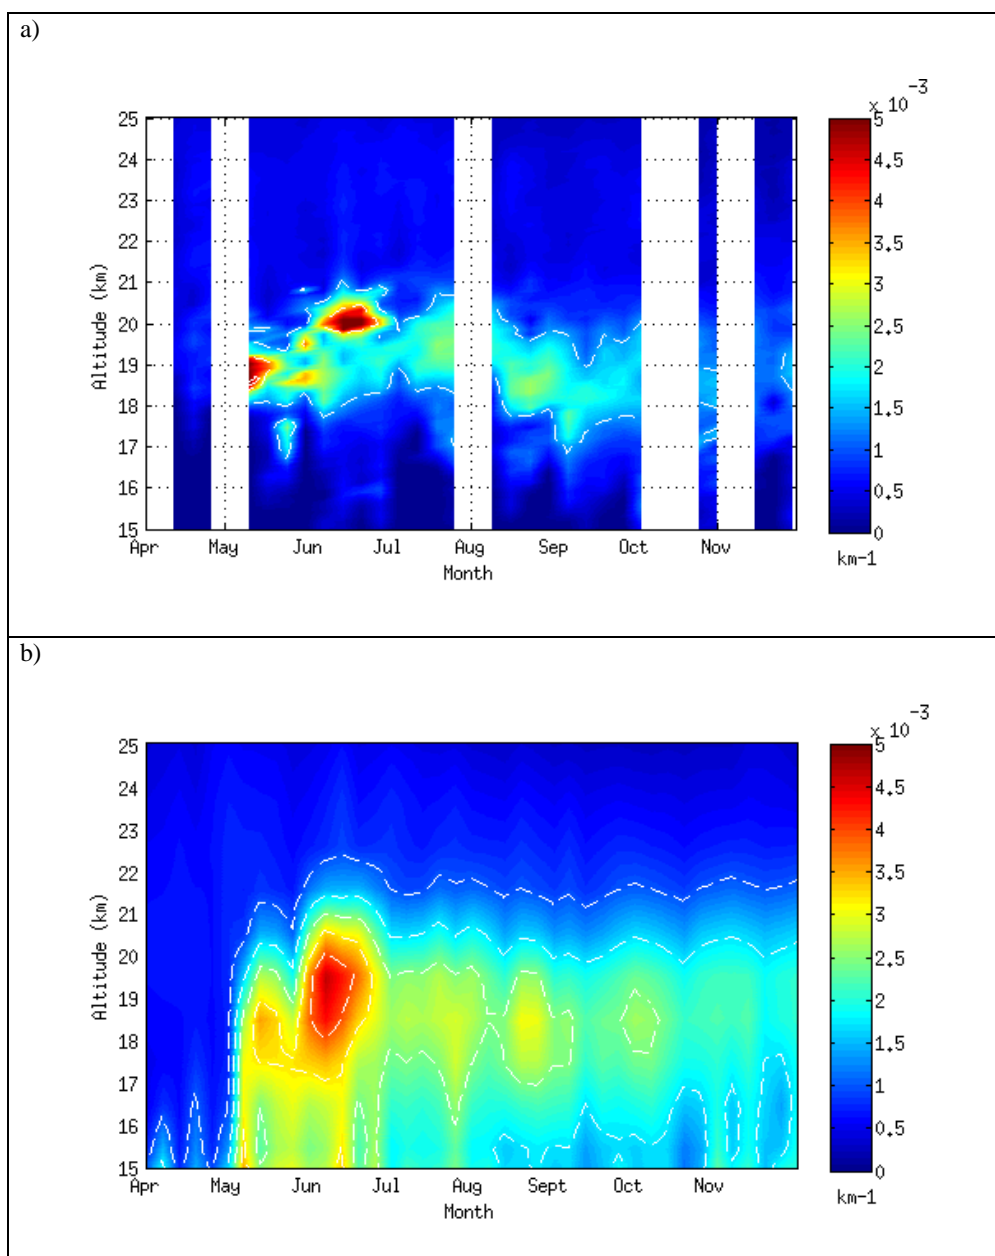

2 **Figure 6** : Time series of weekly-averaged profiles of extinction at 532 nm obtained from (a)  
3 lidar and (b) OMPS observations over Reunion between April 2015 and December 2015.

4



1

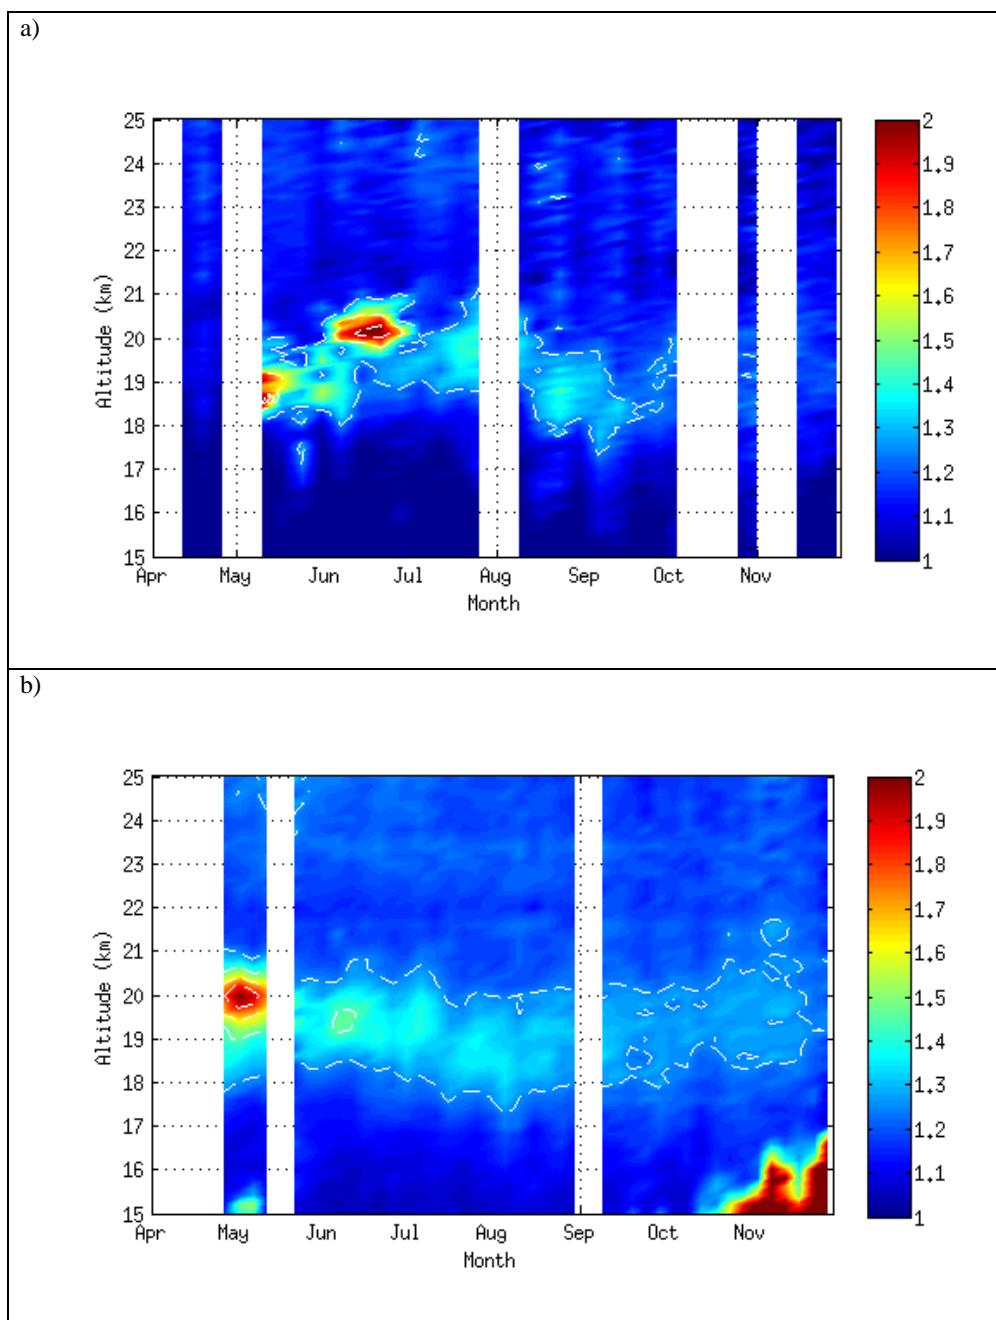

2 **Figure 7** : Time series of weekly-averaged profiles of scattering ratio at 532 nm obtained  
3 from (a) lidar and (b) CALIOP observations over Reunion between April 2015 and December  
4 2015.

5



1

2

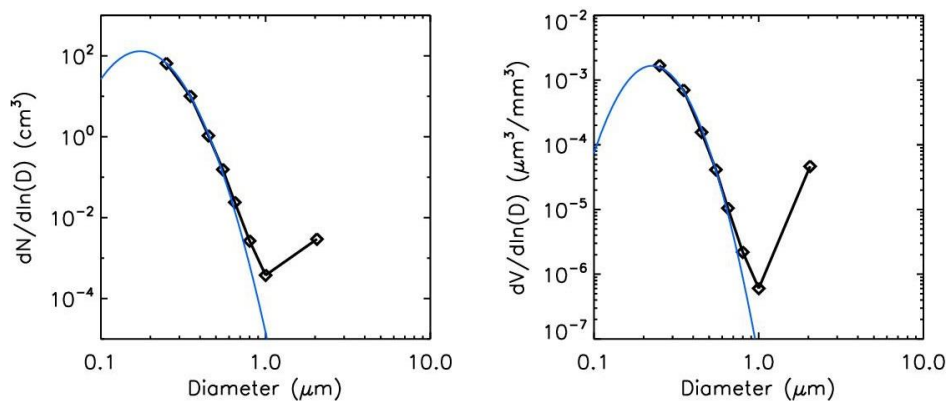

3

4 **Figure 8 :** Number ( $dN/d\ln(D)$ ) and Volume concentration ( $dV/d\ln(D)$ ) obtained from LOAC  
5 OPC observations on 19 May 2015 at 1746 UTC over the Reunion site.

6

7

8

9

10



1

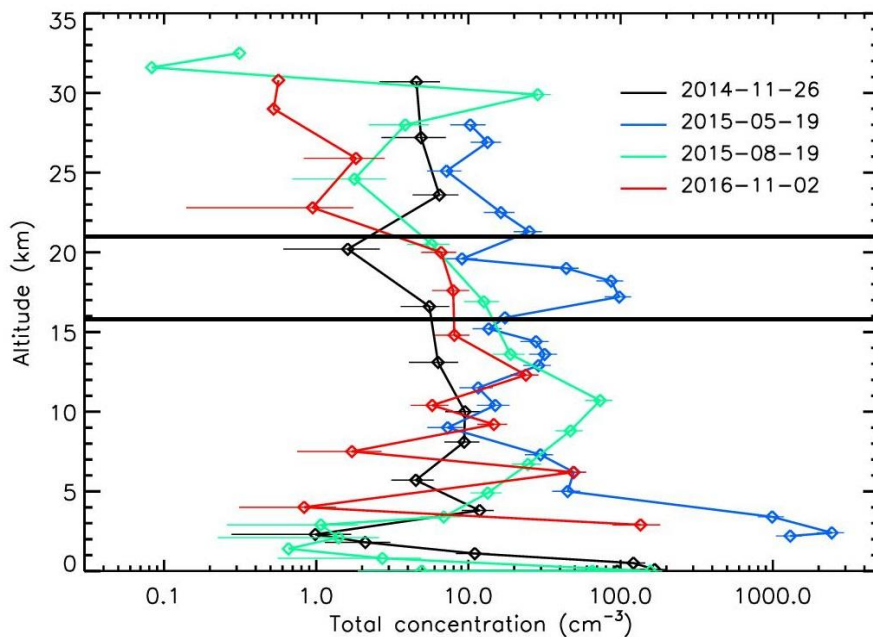

2

3 **Figure 9** : Total number concentration of aerosols (0.2-50 μm) profiles obtained from LOAC  
4 OPC observations over Reunion during the 26 November 2014 (black line), the 19 May 2015  
5 (blue line), the 19 August 2015 (green line) and the 2 November 2016 (red line). The aerosols  
6 layer is delimited by two horizontal black lines.

7

8

9

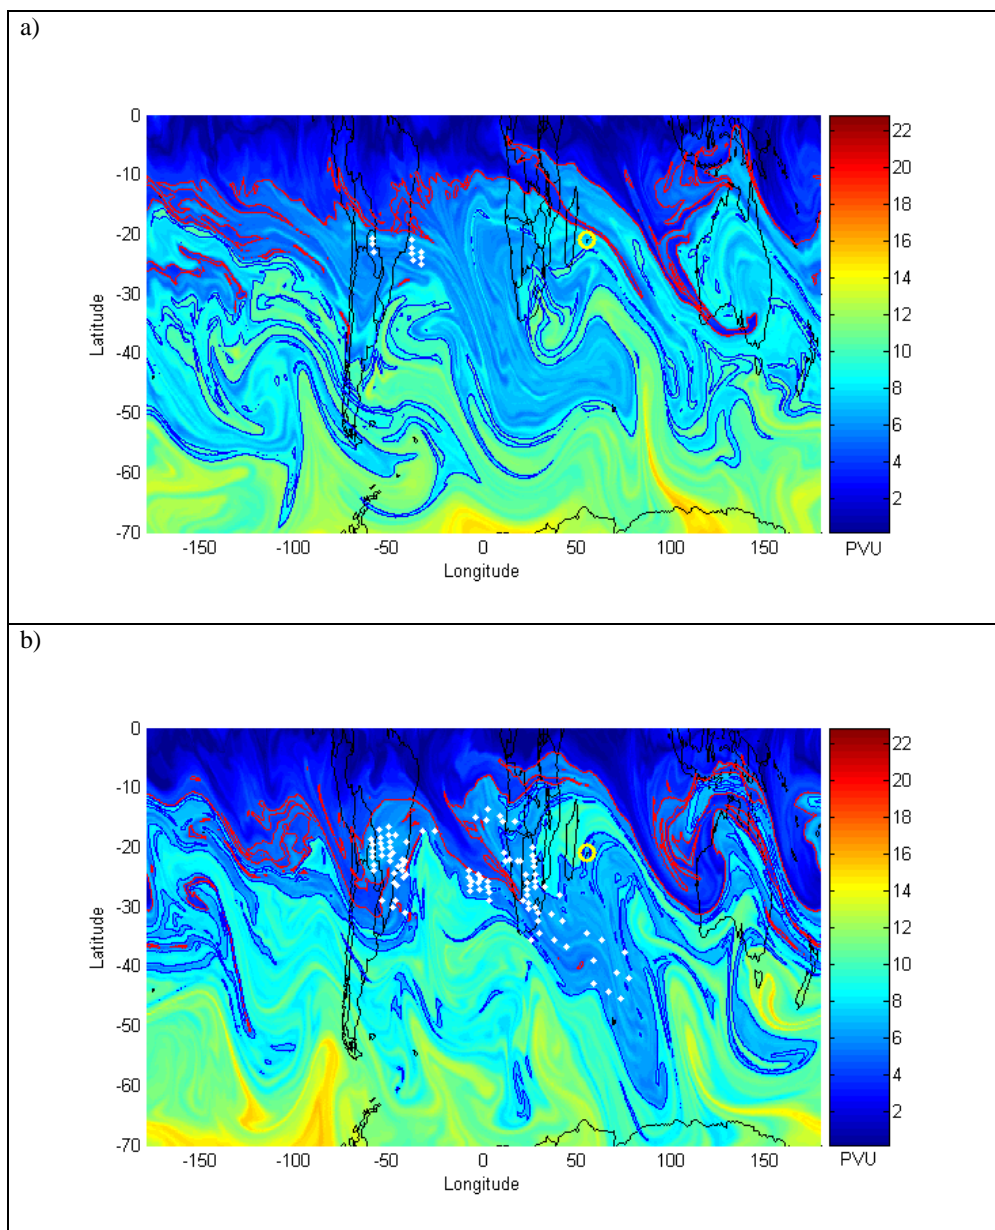

1 **Figure 10** : Advected PV map at the 400 K level obtained from the MIMOSA model (a) on  
2 27 April 2015 and (b) on 01 May 2015. The positions of the subtropical barrier (red line) and  
3 a south dynamical barrier (blue line) are detected from the DyBAL code. The white dots  
4 represent the localization of the aerosol plume at  $400 \text{ K} \pm 5 \text{ K}$  obtained from OMPS  
5 observations, while the yellow circles indicate the Reunion site.



1

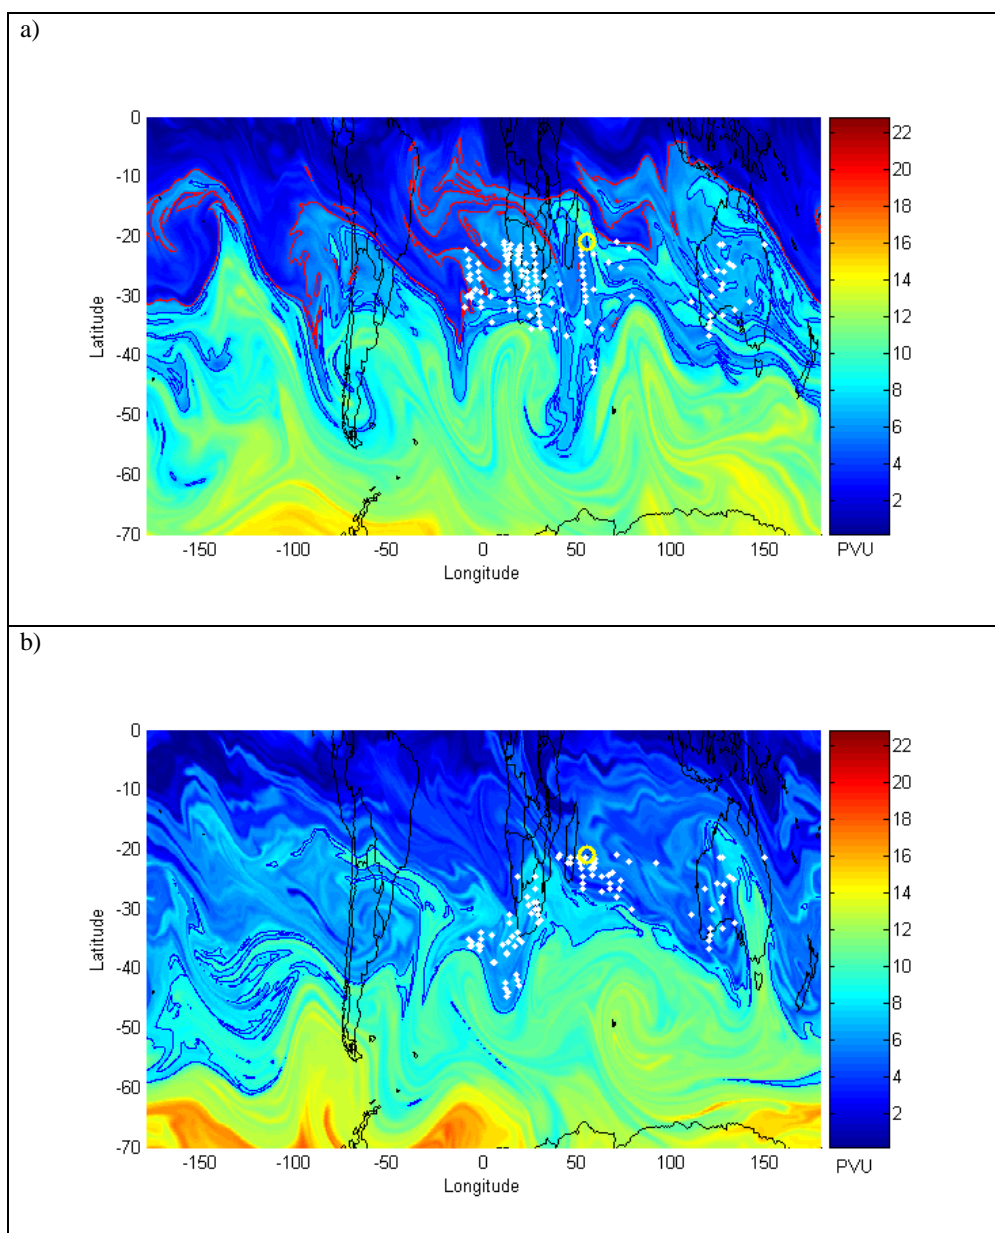

2 **Figure 11:** Same as Figure 10 but for (a) 19 May 2015 and (b) 03 June 2015.
